# Supplementary material for: Associations among dietary non-fiber carbohydrate, ruminal microbiota and epithelium G-protein-coupled receptor, and histone deacetylase regulations in goats
Source: PubMed Central journal article supplement (PMC5606034; doi:10.1186/s40168-017-0341-z), 2017-09-19
Supplement: 40168_2017_341_MOESM2_ESM.pdf [file 40168_2017_341_MOESM2_ESM.pdf]

Table S2. Rumen microbial compositions of the MC and LC groups

| Item | Genus                      | MC        | LC        |
|------|----------------------------|-----------|-----------|
| 1    | F_Synergistaceae           | 11029±136 | 6982±44   |
| 2    | Prevotella                 | 10409±51  | 17949±687 |
| 3    | F_Veillonellaceae          | 6629±177  | 2984±93   |
| 4    | Subdivision5_genera_IS     | 6513±105  | 5711±142  |
| 5    | F_Ruminococcaceae          | 6295±141  | 5301±116  |
| 6    | F_Lachnospiraceae          | 5827±48   | 3441±52   |
| 7    | F_Porphyrromonadaceae      | 4867±171  | 1418±28   |
| 8    | O_Clostridiales            | 4635±84   | 2479±41   |
| 9    | O_Bacteroidales            | 4159±61   | 10386±164 |
| 10   | P_Firmicutes               | 3479±57   | 2225±124  |
| 11   | P_Bacteroidetes            | 3013±42   | 4709±112  |
| 12   | F_Prevotellaceae           | 2811±87   | 4163±79   |
| 13   | Vampirovibrio              | 1822±78   | 1811±89   |
| 14   | O_Selenomonadales          | 1494±40   | 6920±61   |
| 15   | Oscillibacter              | 1309±8    | 1504±51   |
| 16   | F_Erysipelotrichaceae      | 1051±48   | 150±11    |
| 17   | Anaeroplasma               | 1048±76   | 286±17    |
| 18   | Clostridium_IV             | 823±58    | 168±17    |
| 19   | Lachnospiracea_IS          | 814±20    | 1187±49   |
| 20   | Butyrivibrio               | 795±28    | 693±33    |
| 21   | Saccharibacteria_genera_IS | 781±53    | 834±33    |
| 22   | Anaerovorax                | 712±45    | 888±43    |
| 23   | Treponema                  | 582±19    | 871±36    |
| 24   | Paraprevotella             | 563±42    | 1114±23   |
| 25   | F_Coriobacteriaceae        | 549±32    | 486±13    |
| 26   | Ruminococcus               | 512±47    | 485±41    |
| 27   | F_Desulfovibrionaceae      | 438±13    | 176±29    |
| 28   | Barnesiella                | 378±26    | 458±38    |
| 29   | Fibrobacter                | 364±35    | 1038±64   |
| 30   | C_Alphaproteobacteria      | 363±21    | 1541±77   |
| 31   | Victivallis                | 310±12    | 945±20    |
| 32   | Schwartzia                 | 304±35    | 322±15    |
| 33   | Sphaerochaeta              | 302±14    | 38±1      |
| 34   | Acetivibrio                | 257±17    | 302±19    |
| 35   | F_Spirochaetaceae          | 254±21    | 191±28    |
| 36   | Hallella                   | 247±16    | 1504±18   |
| 37   | F_Anaerolineaceae          | 211±25    | 48±15     |
| 38   | Slackia                    | 208±21    | 380±16    |
| 39   | Paludibacter               | 183±45    | 1534±58   |
| 40   | F_Mycoplasmataceae         | 182±21    | 0         |
| 41   | Oligosphaera               | 169±21    | 321±25    |
| 42   | F_Enterobacteriaceae       | 157±28    | 310±26    |

|    |                          |           |         |
|----|--------------------------|-----------|---------|
| 43 | C_Clostridia             | 138±13    | 57±8    |
| 44 | Syntrophococcus          | 126±13    | 215±17  |
| 45 | C_Deltaproteobacteria    | 121±15    | 439±25  |
| 46 | O_Campylobacterales      | 118±11    | 99±12   |
| 47 | Saccharofermentans       | 106±19    | 246±32  |
| 48 | Clostridium_XIVa         | 104±24    | 70±6    |
| 49 | Desulfovibrio            | 80±4      | 93±16   |
| 50 | Roseburia                | 70±8      | 105±13  |
| 51 | Moryella                 | 64±10     | 28±2    |
| 52 | Olsenella                | 51±3      | 17±6    |
| 53 | Anaerovibrio             | 50±4      | 31±8    |
| 54 | Succiniclasticum         | 47±7      | 38±17   |
| 55 | Atopobium                | 45±10     | 58±0    |
| 56 | Sporobacter              | 40±7      | 149±2   |
| 57 | Coprococcus              | 39±5      | 44±8    |
| 58 | O_Desulfuromonadales     | 38±7      | 33±11   |
| 59 | Howardella               | 37±6      | 28±3    |
| 60 | Candidatus_Endomicrobium | 37±4      | 26±7    |
| 61 | Pseudobutyrvibrio        | 19±7      | 52±10   |
| 62 | Enterorhabdus            | 18±6      | 13±4    |
| 63 | P_Proteobacteria         | 15±7      | 32±9    |
| 64 | Armatimonadetes_gp2      | 13±9      | 94±11   |
| 65 | Blautia                  | 12±3      | 0       |
| 66 | Mogibacterium            | 9±6       | 18±7    |
| 67 | Suttonella               | 7±4       | 21±12   |
| 68 | F_Puniceicoccaceae       | 4±4       | 15±7    |
| 69 | F_Sphingobacteriaceae    | 4±4       | 252±15  |
| 70 | F_Sutterellaceae         | 3±3       | 41±6    |
| 71 | Bilophila                | 3±3       | 23±5    |
| 72 | F_Peptostreptococcaceae  | 0         | 15±5    |
| 73 | Akkermansia              | 0         | 17±4    |
| 74 | Alloprevotella           | 0         | 64±3    |
| 75 | Unclassified_Baceteria   | 11741±154 | 3302±93 |

Values are mean ±standard error of mean (SEM).

OTUs less than 3 counts in all samples were removed, and then normalized to the relative abundance for each sample (showed here in a scale of 1/100,000).

Genera were sorted based on their relative abundance in a descending order.

F = Family; O = Order; C = Class; P = Phylum.
