# Supplementary material for: Associations among dietary non-fiber carbohydrate, ruminal microbiota and epithelium G-protein-coupled receptor, and histone deacetylase regulations in goats
Source: PubMed Central journal article supplement (PMC5606034; doi:10.1186/s40168-017-0341-z), 2017-09-19
Supplement: 40168_2017_341_MOESM5_ESM.pdf [file 40168_2017_341_MOESM5_ESM.pdf]

Table S3. Expression profile of the members of the GPR family observed in present study.

| Item | Gene                 | MC (RPKM)    | LC (RPKM)  | <i>P</i> | Chromosome |
|------|----------------------|--------------|------------|----------|------------|
| 1    | GPR87 <sup>1</sup>   | 111.53±11.92 | 54.57±4.42 | 0.008    | 1          |
| 2    | GPR1 <sup>1</sup>    | 20.47±2.76   | 10.94±3.17 | 0.017    | 2          |
| 3    | GPR89A <sup>1</sup>  | 14.27±1.84   | 8.42±1.37  | 0.046    | 3          |
| 4    | GPR155 <sup>1</sup>  | 10.28±3.26   | 4.22±1.36  | 0.002    | 2          |
| 5    | FFAR4 <sup>2</sup>   | 3.80±1.42    | 10.20±4.44 | 0.001    | 26         |
| 6    | HCAR2 <sup>2</sup>   | 2.32±0.87    | 8.26±6.86  | 0.001    | 17         |
| 7    | GPR107 <sup>2</sup>  | 1.31±0.38    | 2.90±0.50  | 0.008    | 11         |
| 8    | GPR160 <sup>3</sup>  | 32.14±4.26   | 31.78±2.31 | 0.962    | 1          |
| 9    | GPR108 <sup>3</sup>  | 13.33±1.89   | 19.20±3.11 | 0.142    | 7          |
| 10   | GPR180 <sup>3</sup>  | 8.07±2.11    | 6.38±1.23  | 0.442    | 12         |
| 11   | GPR137B <sup>3</sup> | 5.77±1.79    | 4.59±0.95  | 0.372    | 28         |
| 12   | GPR171 <sup>3</sup>  | 3.95±0.93    | 2.11±0.61  | 0.704    | 1          |
| 13   | GPR34 <sup>3</sup>   | 2.95±0.90    | 0.78±0.28  | 0.130    | X          |
| 14   | GPR157 <sup>3</sup>  | 2.58±2.58    | 6.15±1.66  | 1        | 16         |
| 15   | GPR15 <sup>3</sup>   | 2.49±1.07    | 1.52±0.54  | 0.255    | 1          |
| 16   | GPR19 <sup>3</sup>   | 2.27±0.56    | 1.84±0.68  | 0.616    | 5          |
| 17   | GPR18 <sup>3</sup>   | 2.05±0.69    | 1.41±0.28  | 0.709    | 12         |
| 18   | GPR65 <sup>3</sup>   | 1.72±0.48    | 0.77±0.53  | 0.083    | 10         |
| 19   | GPR82 <sup>3</sup>   | 1.19±0.58    | 0.41±0.07  | 0.397    | X          |
| 20   | GPR137 <sup>3</sup>  | 1.12±0.73    | 1.06±0.21  | 0.893    | 29         |

Values are mean ± standard error of mean (SEM).

*P* is the *p* value obtained from the two-side t-test.

<sup>1</sup> indicated the genes significantly upregulated in the MC group, compared with the LC group.

<sup>2</sup> indicated the genes significantly downregulated in the MC group, compared with the LC group.

<sup>3</sup> indicated the genes expressed in the rumen epithelium, but no significant difference.
