# Supplementary material for: Associations among dietary non-fiber carbohydrate, ruminal microbiota and epithelium G-protein-coupled receptor, and histone deacetylase regulations in goats
Source: PubMed Central journal article supplement (PMC5606034; doi:10.1186/s40168-017-0341-z), 2017-09-19
Supplement: 40168_2017_341_MOESM6_ESM.pdf [file 40168_2017_341_MOESM6_ESM.pdf]

Table S4. The expression profile of the members of the HDAC family observed in present study.

| Item | Gene                | MC (RPKM)    | LC (RPKM)   | <i>P</i> | Chromosome |
|------|---------------------|--------------|-------------|----------|------------|
| 1    | HDAC1 <sup>1</sup>  | 215.33±37.70 | 173.88±5.53 | 0.033915 | 2          |
| 2    | HDAC5 <sup>2</sup>  | 6.01±2.56    | 12.32±1.47  | 0.0071   | 19         |
| 3    | HDAC6 <sup>2</sup>  | 1.80±0.31    | 3.52±0.54   | 0.0298   | X          |
| 4    | HDAC4 <sup>2</sup>  | 2.25±1.14    | 4.39±2.30   | 0.0444   | 3          |
| 5    | HDAC10 <sup>2</sup> | 1.38±0.71    | 3.06±0.22   | 0.04435  | 5          |
| 6    | HDAC3 <sup>3</sup>  | 26.89±5.04   | 25.67±1.16  | 0.844    | 7          |
| 7    | HDAC8 <sup>3</sup>  | 10.59±2.41   | 8.35±1.43   | 0.38155  | X          |
| 8    | HDAC2 <sup>3</sup>  | 37.70±2.44   | 37.93±4.44  | 0.9767   | 9          |

Values are mean ± standard error of mean (SEM).

*P* is the *p* value obtained from the two-side t-test.

<sup>1</sup> indicated the genes significantly upregulated in the MC group, compared with the LC group.

<sup>2</sup> indicated the genes significantly downregulated in the MC group, compared with the LC group.

<sup>3</sup> indicated the genes expressed in the rumen epithelium, but no significant difference.
