# Supplementary material for: Associations among dietary non-fiber carbohydrate, ruminal microbiota and epithelium G-protein-coupled receptor, and histone deacetylase regulations in goats
Source: PubMed Central journal article supplement (PMC5606034; doi:10.1186/s40168-017-0341-z), 2017-09-19

Fig. S4. Maximum likelihood trees constructed by using the HDACs sequences resulting from blast searching in the NCBI nucleotide collection with the threshold of the e-value less than  $1E-5$ .

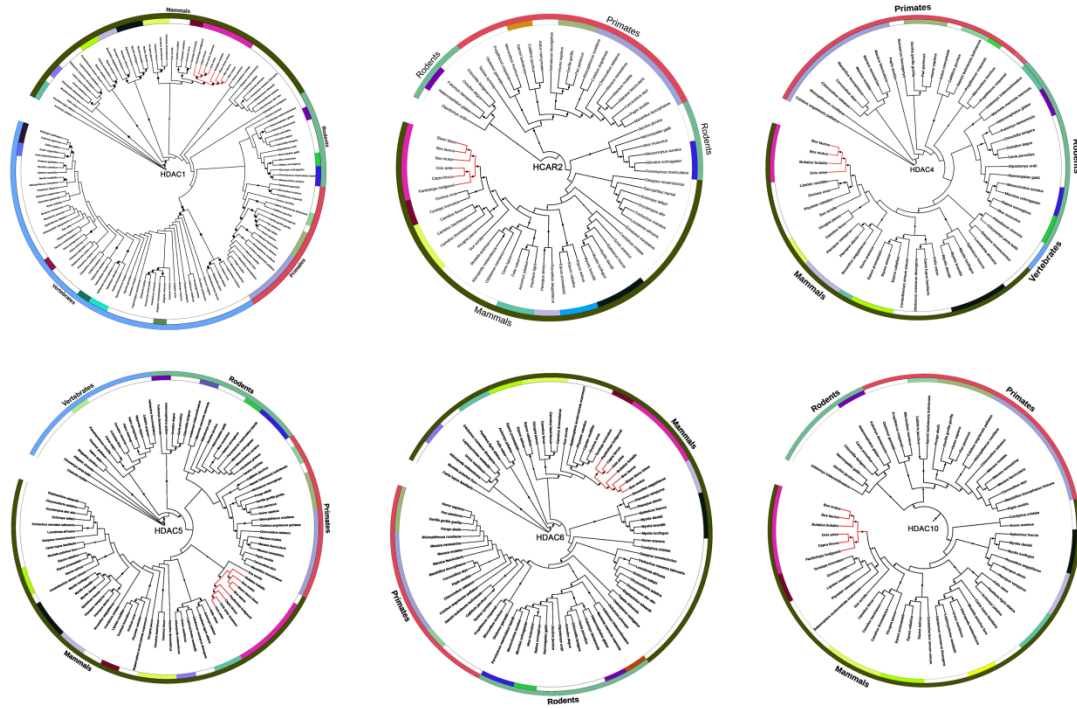

Supplement: 40168_2017_341_MOESM8_ESM.pdf [file 40168_2017_341_MOESM8_ESM.pdf]
